# Supplementary material for: Tuning the size of a redox-active tetrathiafulvalene-based self-assembled ring
Source: publisher site journal article supplement (doi:10.3762/bjoc.11.108), 2015-06-05
Supplement: Additional file 1 [file 1860-5397-11-108-S1.pdf]

**Supporting Information**  
**for**  
**Tuning the size of a redox-active tetrathiafulvalene-based self-assembled ring**

Sébastien Bivaud, Sébastien Goeb,\* Vincent Croué, Magali Allain, Flavia Pop, Marc Sallé\*

Address: Laboratoire MOLTECH-Anjou, Université d'Angers, UMR CNRS 6200,  
2 bd Lavoisier, 49045 Angers Cedex, France. Fax: 0033241735439, Tel: 0033241735405

Email: Sébastien Bivaud - sebastien.goeb@univ-angers.fr; Marc Sallé - marc.salle@univ-angers.fr

\*Corresponding author

**General methods, synthetic procedures, spectroscopic data**

|                                                                                                           |           |
|-----------------------------------------------------------------------------------------------------------|-----------|
| <b>CHEMICALS, INSTRUMENTATION AND TITRATION</b>                                                           | <b>S2</b> |
| Chemicals                                                                                                 | s2        |
| Instrumentation                                                                                           | s2        |
| <b>EXPERIMENTAL PROCEDURE AND CHARACTERIZATION DATA</b>                                                   | <b>S2</b> |
| <b>NMR SPECTRA</b>                                                                                        | <b>S3</b> |
| Figure S1. <sup>1</sup> H NMR spectra of L1 in DMSO-d <sub>6</sub>                                        | s3        |
| Figure S2. <sup>1</sup> H NMR spectra of M <sub>4</sub> L <sub>2</sub> in CD <sub>3</sub> NO <sub>2</sub> | s3        |
| Figure S3. DOSY NMR spectrum of M <sub>4</sub> L <sub>2</sub> in CD <sub>3</sub> NO <sub>2</sub>          | s4        |
| Figure S4. <sup>1</sup> H NMR spectra of M <sub>6</sub> L <sub>3</sub> in DMSO-d <sub>6</sub>             | s4        |
| Figure S5. <sup>19</sup> F NMR spectrum of M <sub>6</sub> L <sub>3</sub> in DMSO-d <sub>6</sub>           | s5        |
| Figure S6. COSY NMR spectrum of M <sub>6</sub> L <sub>3</sub> in DMSO-d <sub>6</sub>                      | s5        |
| Figure S7. DOSY NMR spectrum of M <sub>6</sub> L <sub>3</sub> in DMSO-d <sub>6</sub>                      | s6        |
| <b>MASS SPECTROMETRY ANALYSIS</b>                                                                         | <b>S7</b> |
| Figure S7. HRMS Mass spectrometry of M <sub>6</sub> L <sub>3</sub>                                        | s7        |
| <b>X-RAY STRUCTURES</b>                                                                                   | <b>S7</b> |

## Chemicals, instrumentation and titration

### Chemicals

All reagents were of commercial reagent grade and were used without further purification. Ligand L1,<sup>1</sup> complex  $M_4L_2$ <sup>1</sup> and  $enPd(OTf)_2$ ,<sup>2</sup> (en = ethylenediamine; OTf = trifluoromethane-sulfonate) were synthesized as described in literature.

### Instrumentation

The 300.3 (<sup>1</sup>H, DOSY, COSY), and 282.6 MHz (<sup>19</sup>F) NMR spectra were recorded at room temperature using perdeuterated solvents as internal standards (<sup>1</sup>H), external CFC1<sub>3</sub> (<sup>19</sup>F), on a NMR Bruker Avance III 300 spectrometer. ESI-HRMS spectra were achieved on a Bruker Bruker MaXis 4G (upgrade of MicrO-Tof-Q 2) spectrometer in acetone (100 mmol). Cyclic voltammetry experiments were carried out on a BioLogic SP150 potentiostat, and the conditions were the following: 0.1 M *n*-Bu<sub>4</sub>NPF<sub>6</sub> in acetonitrile or acetonitrile/dichloromethane, Ag/Ag<sup>+</sup> reference electrode, GC or Pt working electrode, and Pt counter electrode, 100 mV.s<sup>-1</sup>, calibrated using internal ferrocen.

X-ray single-crystal diffraction data were collected at 120 K on the Cristal beamline at the SOLEIL Synchrotron (Saint-Aubin-France) on an Agilent 4-circle diffractometer equipped with an Atlas CCD detector. The experiment was carried out with radiation wavelength of 0.67 Å. The structure was solved by direct methods, expanded and refined on F<sup>2</sup> by full matrix least-squares techniques using SHELXS97 (G.M. Sheldrick, 1998) and SHEXL-2013 (G. M. Sheldrick 1993–2013, Version 2013/4) programs. All non-H atoms were refined anisotropically and empirical absorption was corrected by CrysAlisPro program (CrysAlisPro, Agilent Technologies, V1.171, 2012). The H atoms were included in the calculation without refinement.

## Experimental procedure and characterization data

### Complex M<sub>6</sub>L<sub>3</sub>

A mixture of ligand L1 (10.0 mg, 14.5 μmol) and  $enPd(OTf)_2$  (13.5 mg, 29.0 μmol) in dimethyl sulfoxide (1 mL) was heated at 50°C for 30 min. Then, ethyl acetate (5 mL) was added and the mixture was centrifuged. The residue was washed with ethyl acetate (2 mL), diethyl ether (4 mL) and dried under vacuum to give complex M<sub>6</sub>L<sub>3</sub> (21.6 mg, 36.3 μmol, 92%) as an orange solid. Monocrystals (orange, small lozenges) were obtained by slow diffusion of ethyl acetate in dimethyl sulfoxide (gaz–liquid). <sup>1</sup>H NMR (DMSO-d<sub>6</sub>) δ 8.46 (d, <sup>3</sup>J = 5.9 Hz, 24H), 7.60 (m, 12H), 7.49 (m, 36H), 5.63 (brs, 24H), 2.65 (brs, 24H); <sup>19</sup>F NMR (DMSO-d<sub>6</sub>) δ -76.88; ESI-HRMS m/z: 1468.8899 [M<sub>6</sub>L<sub>3</sub>-9TfO<sup>-</sup>]<sup>3+</sup>, 1064.4296 [M<sub>6</sub>L<sub>3</sub>-8TfO<sup>-</sup>]<sup>4+</sup>, 821.7533 [M<sub>6</sub>L<sub>3</sub>-9TfO<sup>-</sup>]<sup>5+</sup>; mp > 260 °C.

## NMR spectra

Figure S1.  $^1\text{H}$  NMR spectra of L1 in  $\text{DMSO-}d_6$

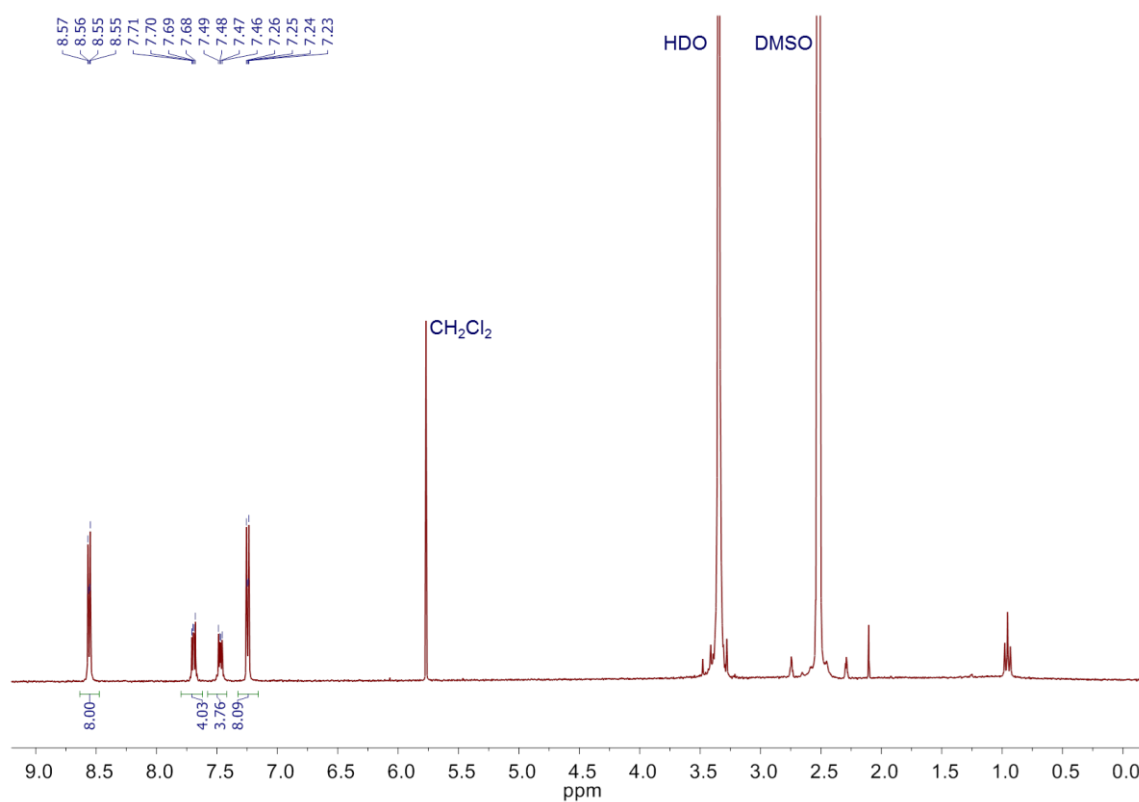

Figure S2.  $^1\text{H}$  NMR spectra of  $\text{M}_4\text{L}_2$  in  $\text{CD}_3\text{NO}_2$

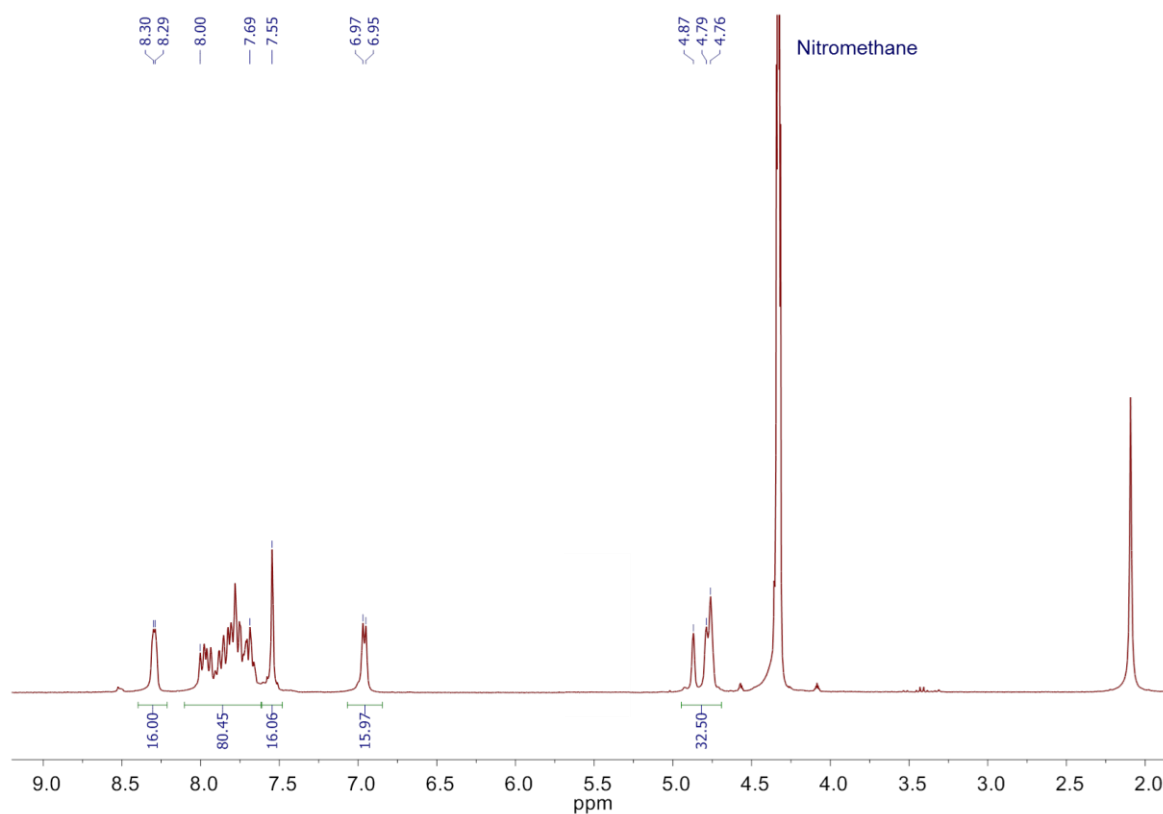

**Figure S3. DOSY NMR spectrum of  $M_4L_2$  in  $CD_3NO_2$**

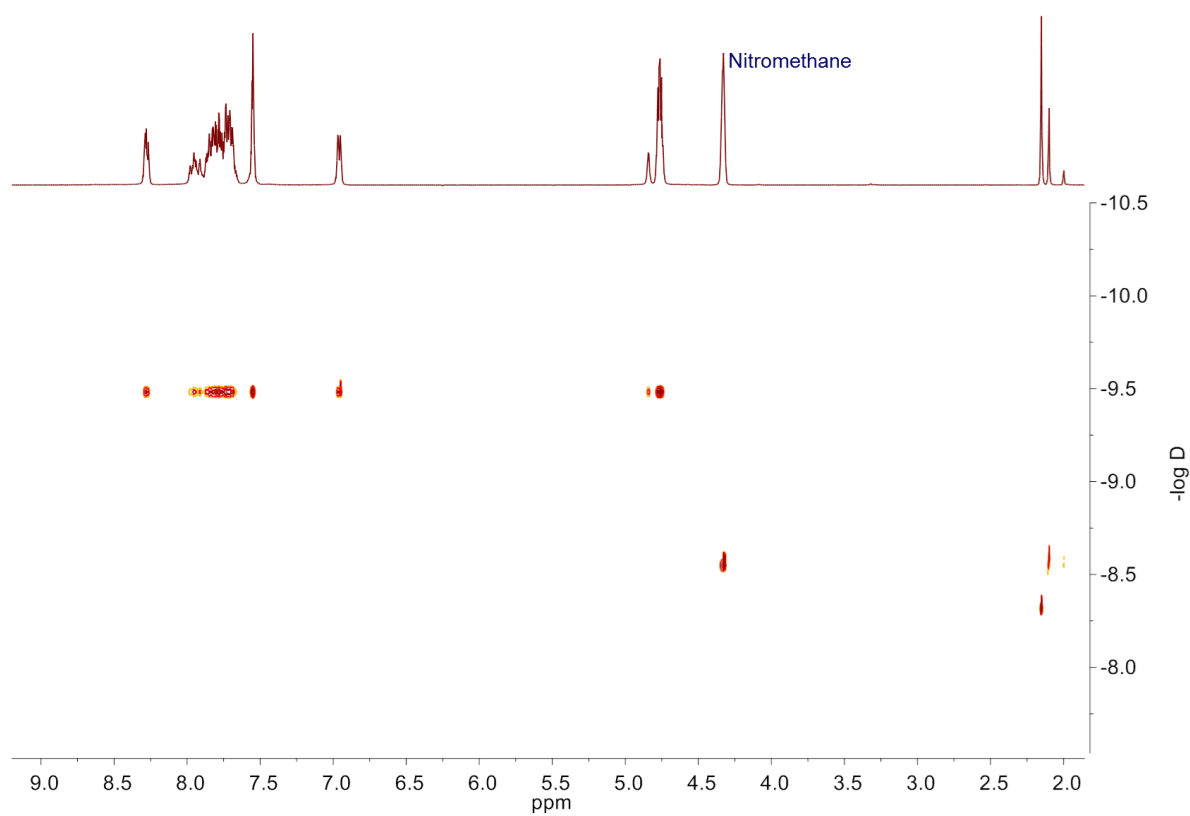

**Figure S4.  $^1H$  NMR spectra of  $M_6L_3$  in  $DMSO-d_6$**

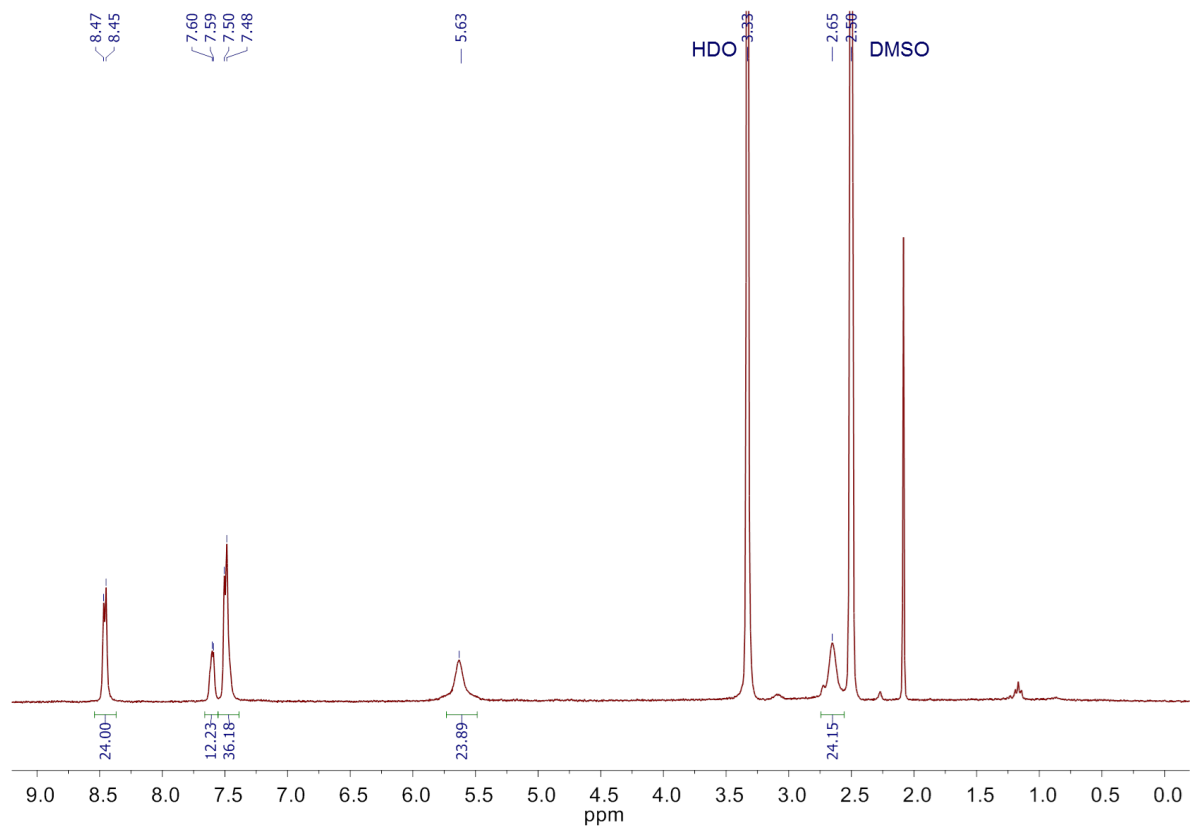

**Figure S5.**  $^{19}\text{F}$  NMR spectrum of  $\text{M}_6\text{L}_3$  in  $\text{DMSO-}d_6$

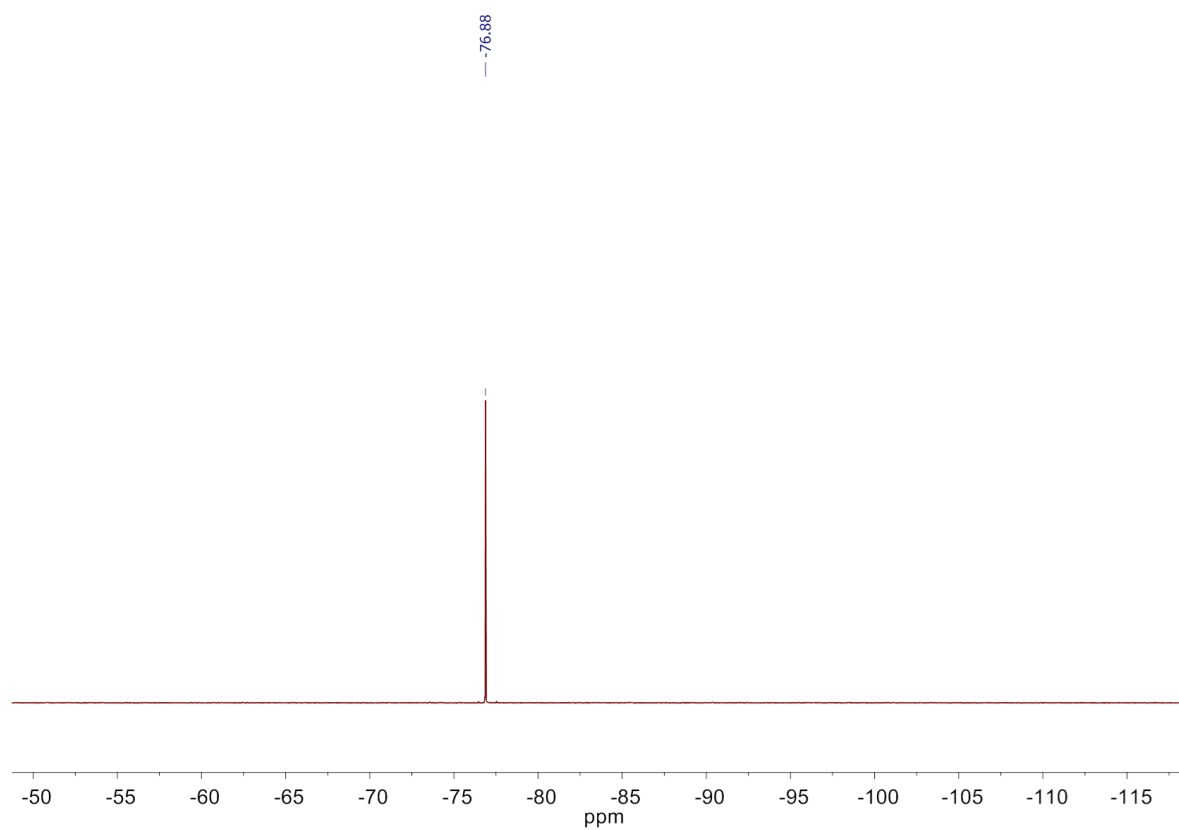

**Figure S6.** COSY NMR spectrum of  $\text{M}_6\text{L}_3$  in  $\text{DMSO-}d_6$

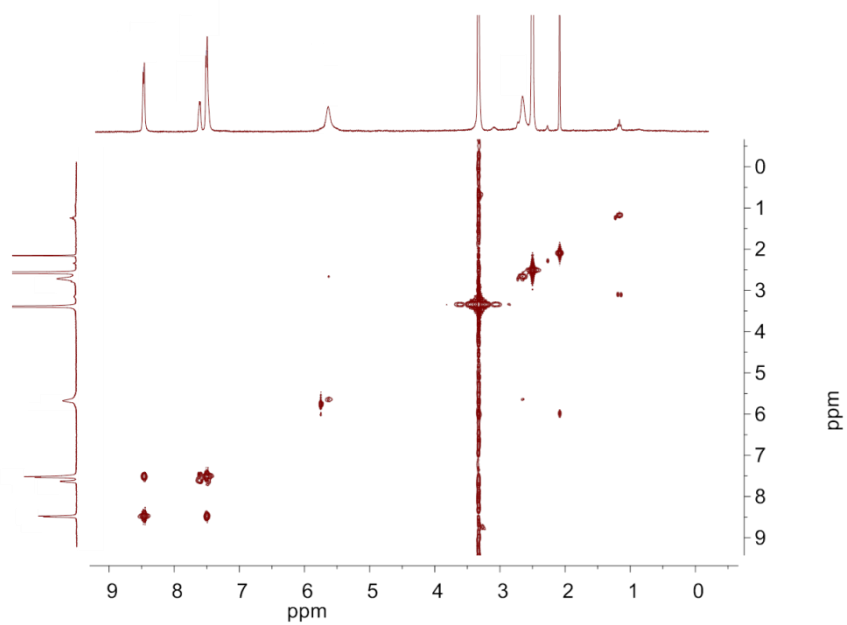

**Figure S7. DOSY NMR spectrum of  $M_6L_3$  in  $DMSO-d_6$**

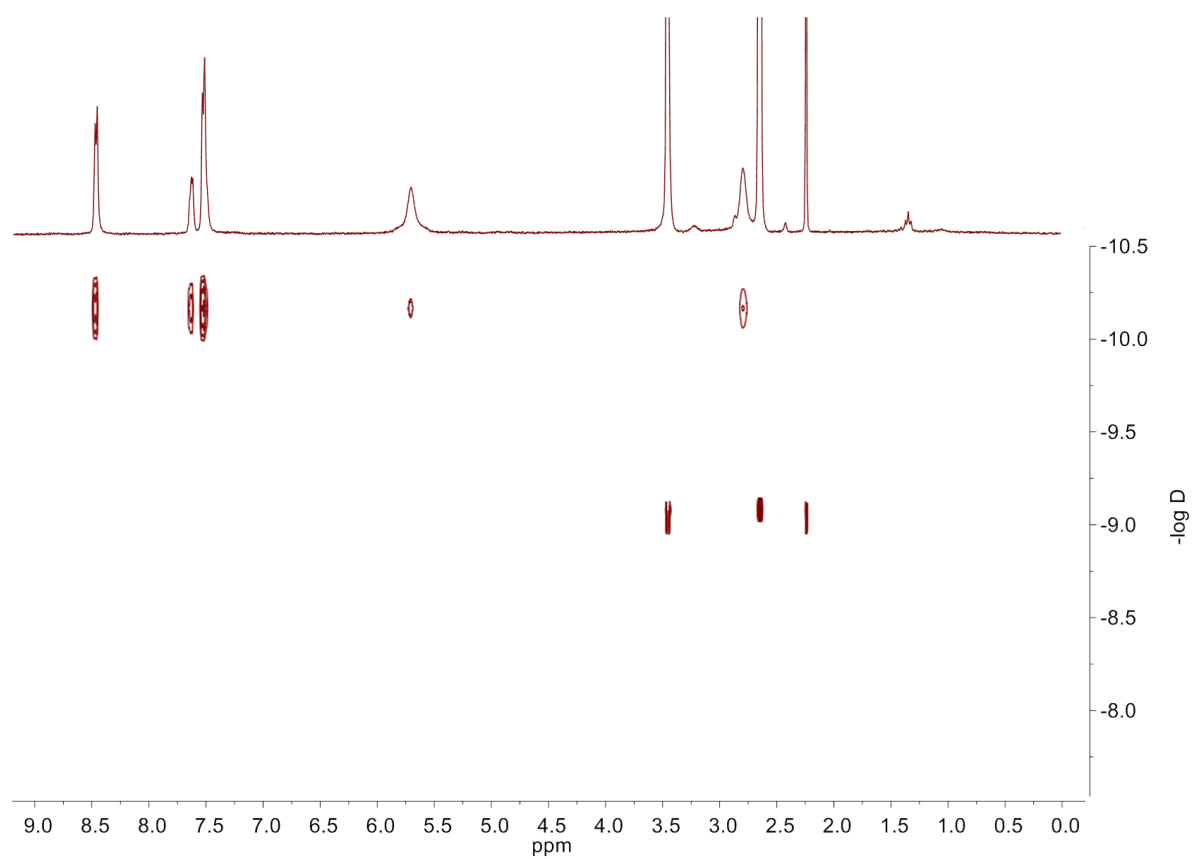

# Mass spectrometry analysis

Figure S8. HRMS Mass spectrometry of  $M_6L_3$

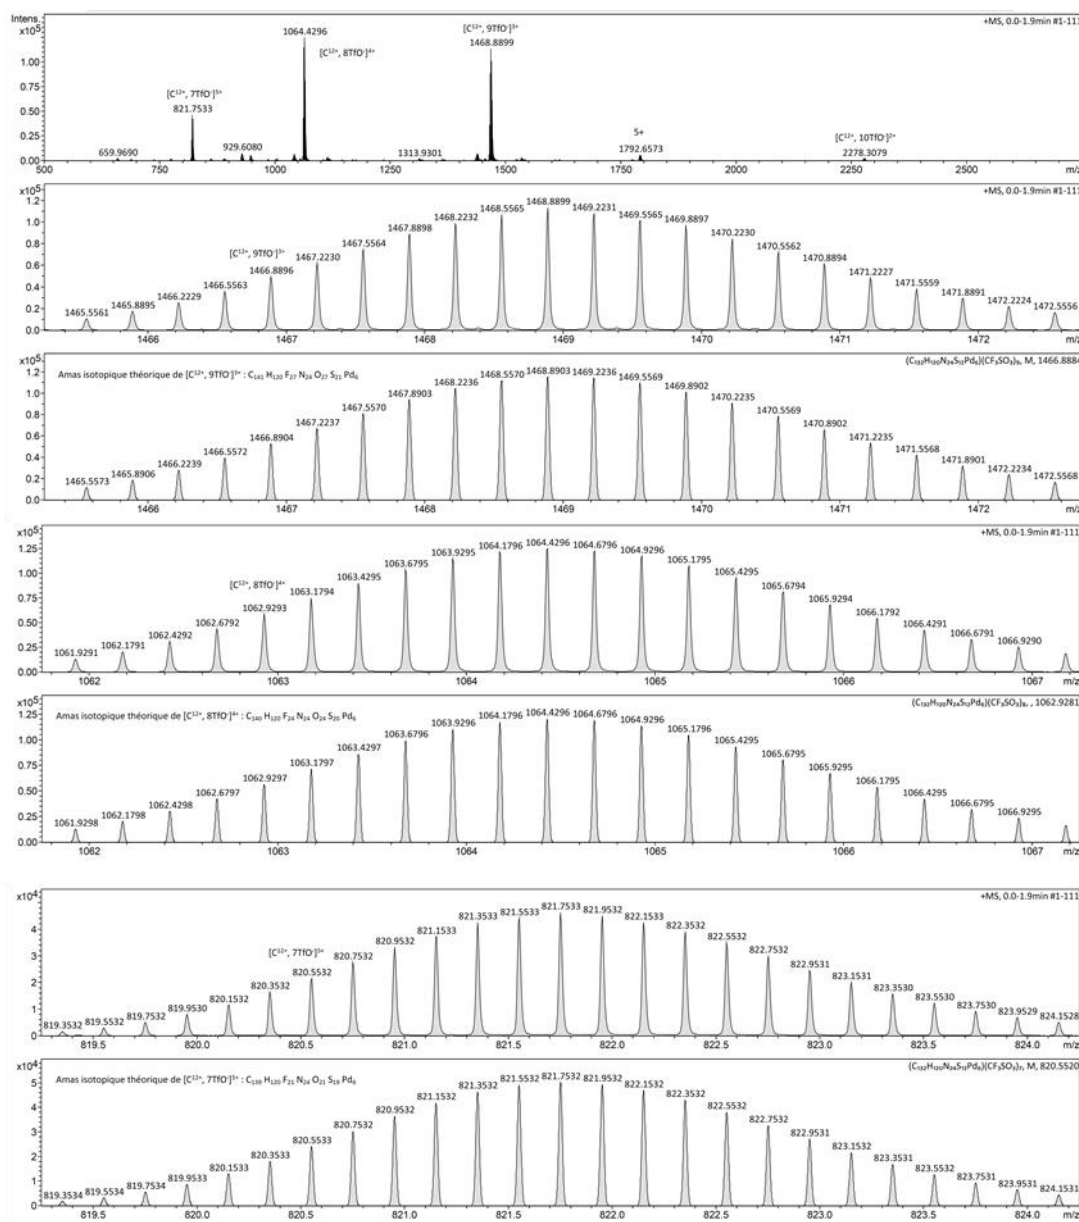

## X-ray structures

Slow diffusion of ethyl acetate in a solution of  $M_6L_3$  in DMSO afforded large orange crystals that tend to decompose rapidly. For this reason, diffraction data with low intensity at theta around  $25^\circ$  and thus low completeness could be collected. Nevertheless, we succeeded in solving the main structure and could determine 4 triflate anions. To improve the refinement, we used PLATON/SQUEEZE command. The unit cell contains anions and solvent molecules which were not modelled but the corresponding scattering contribution were taken into account using SQUEEZE/PLATON procedure. The unit cell contains 1 void of  $20881 \text{ \AA}^3$  containing about 8104 electrons from which 2336 electrons can be attributed to the 32

missing  $\text{CF}_3\text{SO}_3$  anions in the unit cell. The others 5768 electrons can be attributed to solvent molecules. As the solvent composition is not well known, it has not been included in the calculation of the empirical formula, formula weight, density, linear absorption coefficient and  $F(000)$ .

Crystallographic data for  $\text{M}_6\text{L}_3$ :  $\text{C}_{136}\text{H}_{120}\text{F}_{12}\text{N}_{24}\text{O}_{12}\text{Pd}_6\text{S}_{16}$ ,  $M = 3661.91$ , red prism,  $0.19 \times 0.11 \times 0.05 \text{ mm}^3$ , monoclinic, space group  $P2_1/n$ ,  $a = 23.4015(2) \text{ \AA}$ ,  $b = 34.9475(2) \text{ \AA}$ ,  $c = 39.9599(4) \text{ \AA}$ ,  $\beta = 91.391(1)^\circ$ ,  $V = 32670.5(5) \text{ \AA}^3$ ,  $Z = 4$ ,  $\rho_{\text{calc}} = 0.744 \text{ g/cm}^3$ ,  $\mu = 0.354 \text{ mm}^{-1}$ ,  $F(000) = 7360$ ,  $\theta_{\text{min}} = 1.460^\circ$ ,  $\theta_{\text{max}} = 25.091^\circ$ , 701627 reflections collected, 62714 unique ( $R_{\text{int}} = 0.11$ ), parameters / restraints = 1855 / 1,  $R1 = 0.0917$  and  $wR2 = 0.2636$  using 49042 reflections with  $I > 2\sigma(I)$ ,  $R1 = 0.1043$  and  $wR2 = 0.2787$  using all data,  $\text{GOF} = 1.057$ ,  $-1.057 < \Delta\rho < 2.823 \text{ e.\AA}^{-3}$ .

---

## References

<sup>1</sup> S. Bivaud, S. Goeb, V. Croue, P. I. Dron, M. Allain and M. Salle, *J. Am. Chem. Soc.*, 2013, **135**, 10018-10021.

<sup>2</sup> K. Tambara and G. D. Pantos, *Org. Biomol. Chem.*, 2013, **11**, 2466-2472.
